# Supplementary material for: lncRNA PART1 and MIR17HG as ΔNp63α direct targets regulate tumor progression of cervical squamous cell carcinoma
Source: PubMed Central journal article supplement — Cancer Sci. 2020 Sep 29;111(11):4129–41. doi: 10.1111/cas.14649 (PMC7648017; doi:10.1111/cas.14649), 2020-09-29
Supplement: CAS-111-4129-s002.pdf [file CAS-111-4129-s002.pdf]

Figure S2

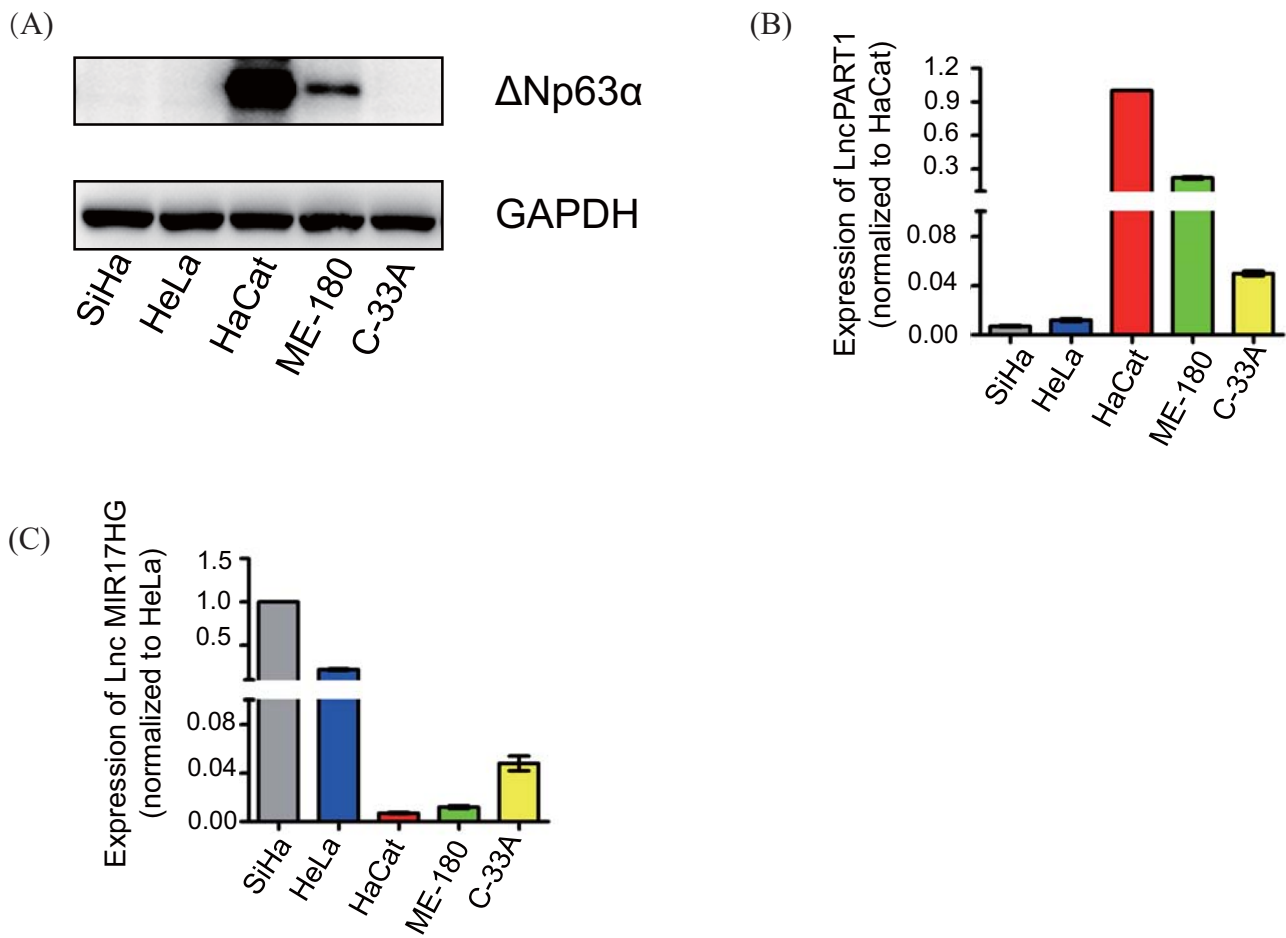

**FIGURE S2**

A, Westernblot analysis of  $\Delta$ Np63 $\alpha$  expression in five cervical squamous cancer cell lines. B, Quantitative analysis of LncPART1 expression in five cervical squamous cancer cell lines. C, Quantitative analysis of LncMIR17HG expression in five cervical squamous cancer cell lines.
