# Supplementary figures and images for: lncRNA PART1 and MIR17HG as ΔNp63α direct targets regulate tumor progression of cervical squamous cell carcinoma
Source: PubMed Central journal article supplement — Cancer Sci. 2020 Sep 29;111(11):4129–41. doi: 10.1111/cas.14649 (PMC7648017; doi:10.1111/cas.14649), 2020-09-29

Figure S1

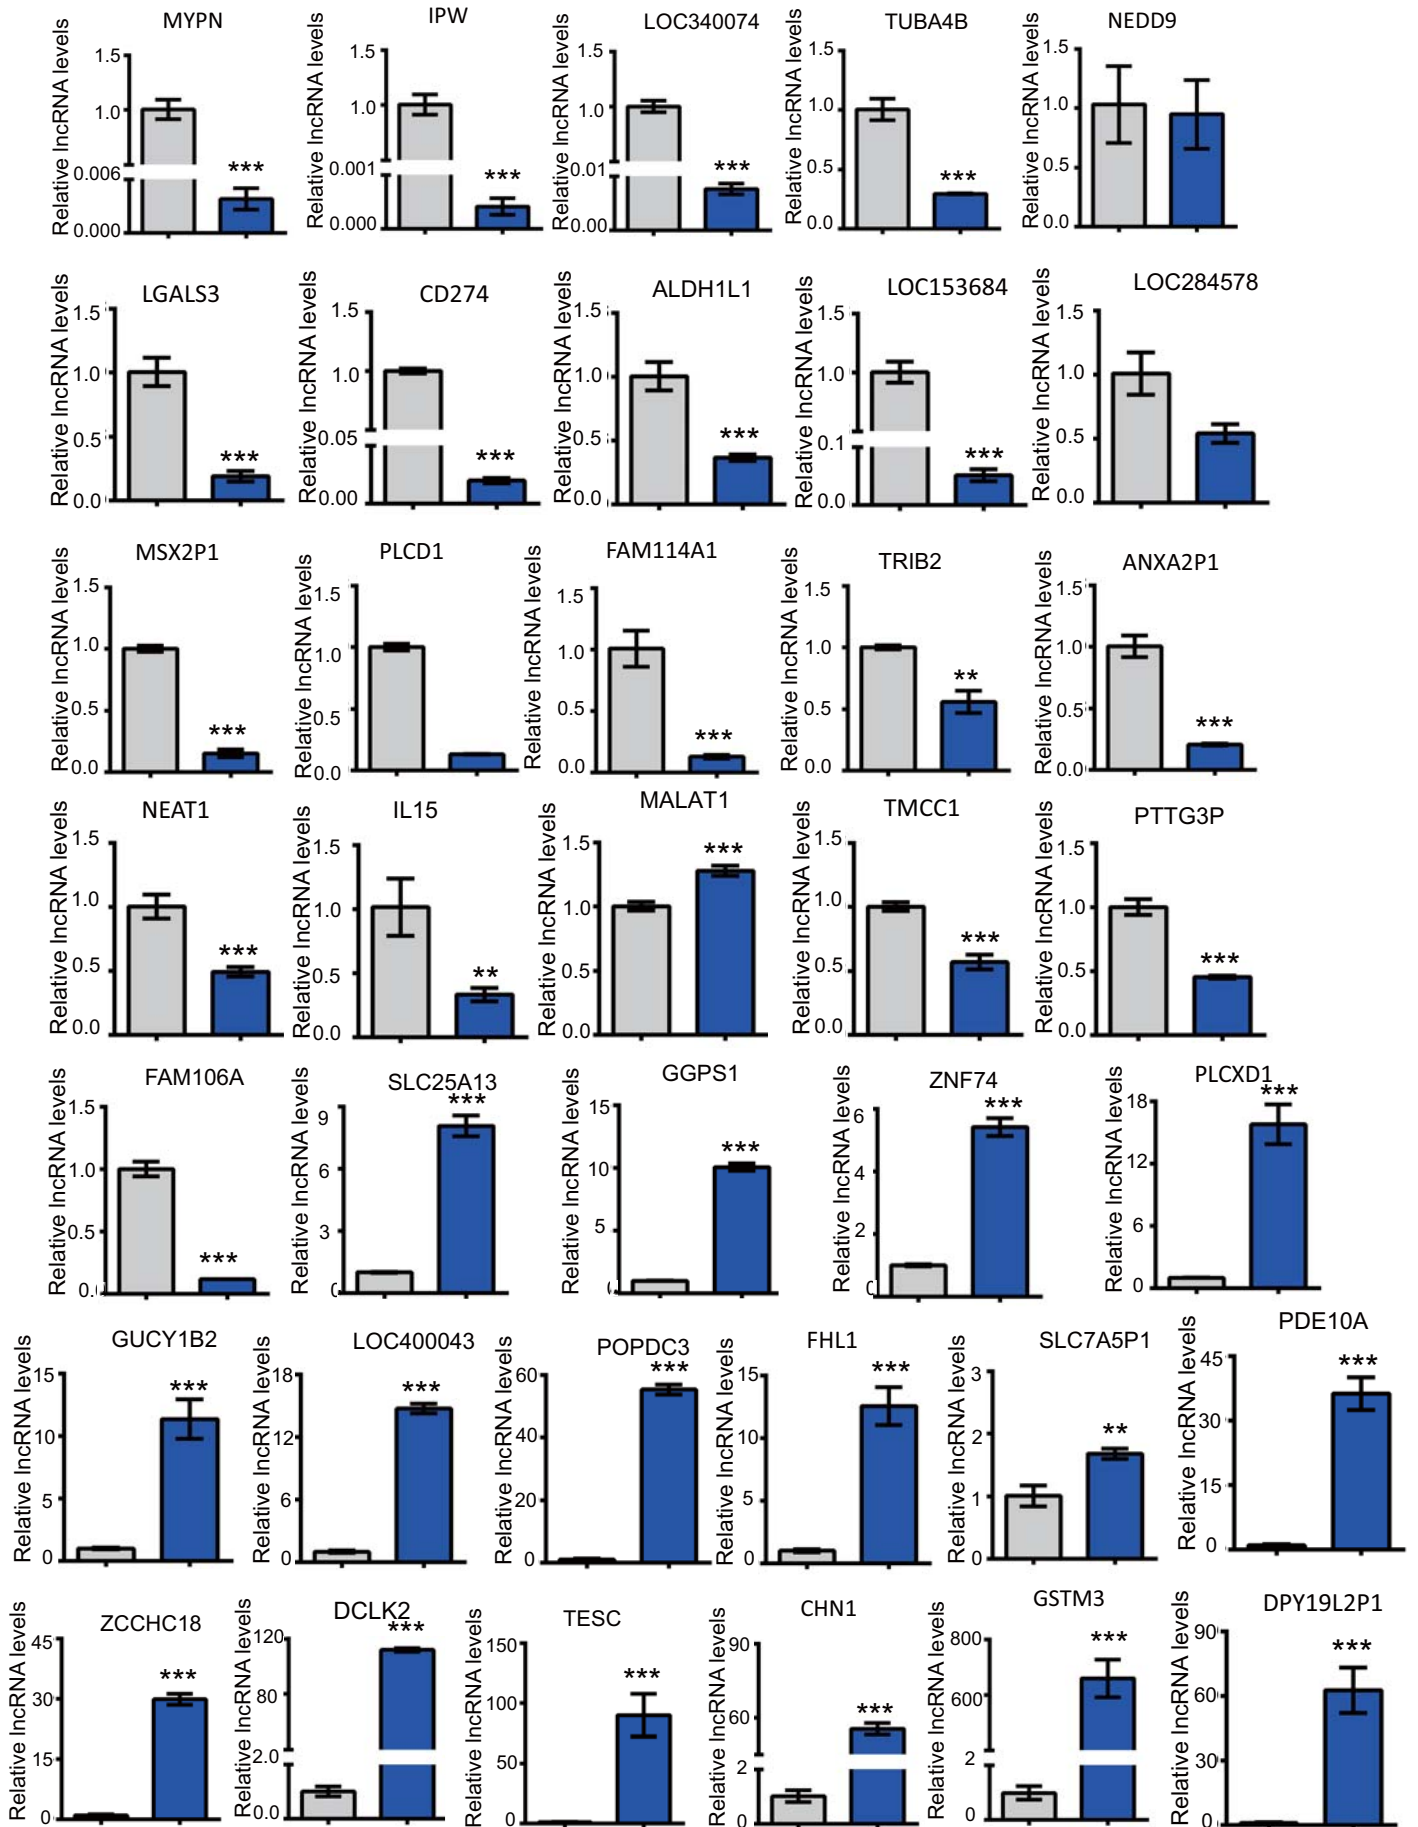

Fig. S1 All the 39 candidate lncRNAs analyzed by qRT-PCR in ME-180/Con and ME-180/shp63 cells.

Supplement: CAS-111-4129-s001.pdf [file CAS-111-4129-s001.pdf]
